# Supplementary material
Source: PubMed Central journal article supplement (PMC3294118)
Supplement: NIHMS322683-supplement-01.pdf [file NIHMS322683-supplement-01.pdf]

Table 1. Patient Characteristics at Study Enrollment

| Characteristic                                                       | All patients<br>(n = 387) | Patients with eye involvement<br>(n = 154) |
|----------------------------------------------------------------------|---------------------------|--------------------------------------------|
| Patient median age, y (range)                                        | 51 (2-79)                 | 51 (11-79)                                 |
| Median time from transplant to enrollment, months (range)            | 12.3 (2.9-39.2)           | 13.1 (3.5-36.2)                            |
| Median time from onset of chronic GVHD to enrollment, months (range) | 2.4 (0-35.3)              | 4.3 (0-30.3)                               |
| Patient gender, no. (%)                                              |                           |                                            |
| Male                                                                 | 226 (58)                  | 84 (55)                                    |
| Female                                                               | 161 (42)                  | 70 (45)                                    |
| Type of enrollment, no. (%)                                          |                           |                                            |
| Incident                                                             | 209 (54)                  | 71 (46)                                    |
| Prevalent                                                            | 178 (46)                  | 83 (54)                                    |
| Diagnosis at transplant, no. (%)                                     |                           |                                            |
| Acute myeloid leukemia                                               | 128 (33)                  | 53 (34)                                    |
| Acute lymphoblastic leukemia                                         | 51 (13)                   | 23 (15)                                    |
| Chronic myeloid leukemia                                             | 19 (5)                    | 7 (5)                                      |
| Chronic lymphocytic leukemia                                         | 27 (7)                    | 6 (4)                                      |
| Myelodysplastic syndrome                                             | 55 (14)                   | 32 (21)                                    |
| Malignant lymphoma                                                   | 72 (19)                   | 22 (14)                                    |
| Multiple myeloma                                                     | 20 (5)                    | 8 (5)                                      |
| Aplastic anemia                                                      | 5 (1)                     | 1 (1)                                      |
| Other                                                                | 10 (3)                    | 2 (1)                                      |
| Graft type, no. (%)                                                  |                           |                                            |
| Bone marrow                                                          | 29 (7)                    | 7 (5)                                      |
| G-CSF-mobilized peripheral blood                                     | 341 (89)                  | 140 (90)                                   |
| Cord blood                                                           | 17 (4)                    | 7 (5)                                      |
| Donor-patient gender combination, no. (%)                            |                           |                                            |
| Female to male                                                       | 108 (28)                  | 44 (29)                                    |
| Other                                                                | 279 (72)                  | 110 (71)                                   |
| HLA and donor type, no. (%)                                          |                           |                                            |
| HLA-matched relative                                                 | 175 (45)                  | 75 (49)                                    |
| HLA-mismatched relative                                              | 8 (2)                     | 1 (1)                                      |
| Unrelated volunteer                                                  | 204 (53)                  | 78 (50)                                    |
| Conditioning regimen, no. (%)                                        |                           |                                            |
| Myeloablative                                                        | 217 (56)                  | 93 (60)                                    |
| Non-myeloablative / reduced-intensity                                | 170 (44)                  | 61 (40)                                    |
| Center, no. (%)                                                      |                           |                                            |
| Fred Hutchinson Cancer Research Center                               | 186 (49)                  | 57 (37)                                    |
| Stanford University Medical Center                                   | 55 (14)                   | 30 (19)                                    |
| Dana-Farber Cancer institute                                         | 47 (12)                   | 23 (15)                                    |
| University of Minnesota                                              | 44 (11)                   | 23 (15)                                    |
| Vanderbilt University Medical Center                                 | 31 (8)                    | 12 (8)                                     |
| Northwestern Children's                                              | 13 (3)                    | 3 (2)                                      |
| Medical College of Wisconsin                                         | 11 (3)                    | 6 (4)                                      |

Table 1. (Continued)

| Characteristic                                           | All patients<br>(n = 387) | Patients with eye involvement <sup>*</sup><br>(n = 154) |
|----------------------------------------------------------|---------------------------|---------------------------------------------------------|
| Prior history of acute GVHD, no. (%)                     |                           |                                                         |
| Present                                                  | 258 (67)                  | 98 (64)                                                 |
| Absent                                                   | 129 (33)                  | 56 (36)                                                 |
| Organ involvement of chronic GVHD <sup>†</sup> , no. (%) |                           |                                                         |
| Skin                                                     | 241 (62)                  | 84 (55)                                                 |
| Mouth                                                    | 237 (61)                  | 113 (73)                                                |
| Eye                                                      | 191 (49)                  | 154 (100)                                               |
| Gastrointestinal tract                                   | 112 (29)                  | 48 (31)                                                 |
| Liver                                                    | 196 (51)                  | 87 (57)                                                 |
| Lung                                                     | 194 (50)                  | 84 (55)                                                 |
| Joint and fascia                                         | 113 (29)                  | 45 (29)                                                 |
| Genital tract                                            | 41 (12)                   | 16 (12)                                                 |
| Severity of NIH eye score, no. (%)                       |                           |                                                         |
| Score 0                                                  | 196 (50)                  | 0 (0)                                                   |
| Score 1                                                  | 119 (31)                  | 87 (57)                                                 |
| Score 2                                                  | 62 (16)                   | 57 (37)                                                 |
| Score 3                                                  | 10 (3)                    | 10 (6)                                                  |
| Measurement scale score                                  |                           |                                                         |
| NIH eye score                                            |                           |                                                         |
| Median (range)                                           | 0 (0-3)                   | 1 (1-3)                                                 |
| Mean (SD)                                                | 0.7 (0.8)                 | 1.5 (0.6)                                               |
| Patient-reported global rating of eye symptoms           |                           |                                                         |
| Median (range)                                           | 2 (0-10)                  | 5 (0-10)                                                |
| Mean (SD)                                                | 3.2 (3.0)                 | 5 (2.8)                                                 |
| Eye subscale of Lee symptom scale                        |                           |                                                         |
| Median (range)                                           | 25 (0-100)                | 58.3 (12.5-100)                                         |
| Mean (SD)                                                | 34.8 (30.2)               | 57.4 (26.2)                                             |
| Ocular surface disease index (OSDI)                      |                           |                                                         |
| Median (range)                                           | 11.4 (0-95.8)             | 22.9 (0-95.8)                                           |
| Mean (SD)                                                | 18.5 (20.0)               | 29.2 (21.5)                                             |
| Schirmer score for the worst eye                         |                           |                                                         |
| Median (range)                                           | 10 (0-35)                 | 5 (0-35)                                                |
| Mean (SD)                                                | 11.9 (9.9)                | 7.4 (7.6)                                               |

GVHD = graft-versus-host disease; NIH = National Institutes of Health; SD = standard deviation.

<sup>\*</sup>Eye involvement was reported by both the clinician and the patient.

<sup>†</sup>Involvement was defined as NIH severity score greater than zero.
