# Supplementary material
Source: PubMed Central journal article supplement (PMC3294118)
Supplement: NIHMS322683-supplement-02.pdf [file NIHMS322683-supplement-02.pdf]

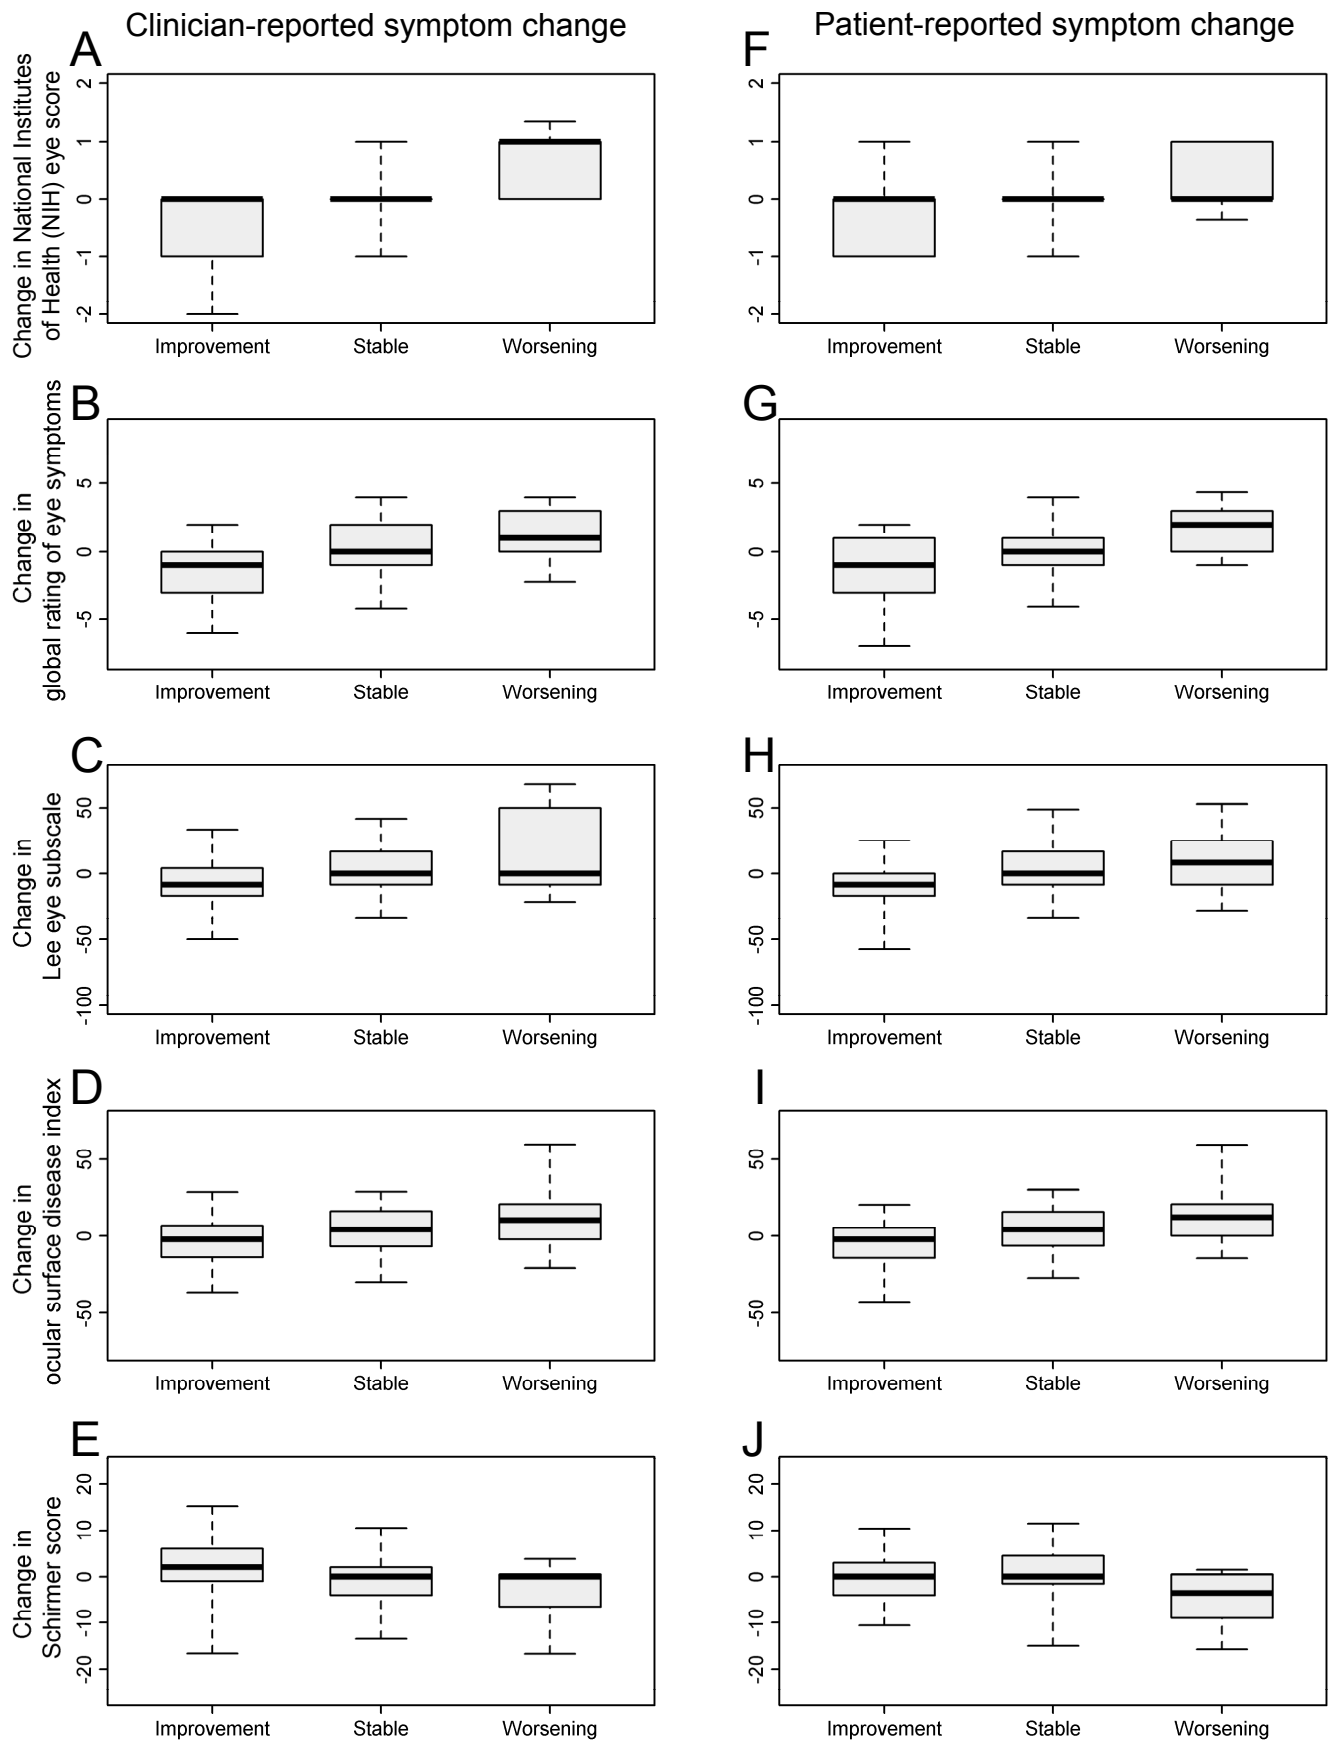

**Figure 3.** The actual changes in measurement scales according to (A–E) clinician-reported or (F–J) patient-reported symptom change. The 8-level reported symptom change scale was collapsed into three categories of improvement, stable or worsening for the X axis. The Y axis represents actual changes in serial measurement scales. Box-plots show median (thick horizontal line), 25 and 75 percentiles (box borders), and 5 and 95 percentiles (outer horizontal lines). (A, F) National Institutes of Health (NIH) eye score. (B, G) Patient-reported global rating of eye symptoms. (C, H) Eye subscale of Lee symptom scale. (D, I) Ocular surface disease index. (E, J) Schirmer test.
